# Supplementary material for: Coverage with evidence development schemes for medical devices in Europe: characteristics and challenges
Source: PubMed Central journal article supplement (PMC8526454; doi:10.1007/s10198-021-01334-9), 2021-06-12
Supplement: 10198_2021_1334_MOESM2_ESM.pdf [file 10198_2021_1334_MOESM2_ESM.pdf]

**Electronic Supplementary Material 2 – List of challenges included in the questionnaire to decision-makers as modified from Reckers-Droog et al.**

| #  | Reckers-Droog et al.                                                                                                                                                                | #  | Challenges included in the questionnaire                                                                            |
|----|-------------------------------------------------------------------------------------------------------------------------------------------------------------------------------------|----|---------------------------------------------------------------------------------------------------------------------|
| 1  | Deciding on whether a CED scheme is required                                                                                                                                        | 1  | Deciding which medical devices are candidates for CED schemes                                                       |
| 2  | Information asymmetry between payers and manufacturers about the potential real-world performance of a technology                                                                   |    |                                                                                                                     |
| 3  | Lengthy and complex negotiations                                                                                                                                                    | 2  | Obtaining stakeholder agreement on the scheme                                                                       |
| 4  | Lack of transparency                                                                                                                                                                |    |                                                                                                                     |
| 5  | Lack of governance                                                                                                                                                                  |    |                                                                                                                     |
| 6  | Stakeholder involvement                                                                                                                                                             |    |                                                                                                                     |
| 7  | Obtaining funding                                                                                                                                                                   | 3  | Securing funding for the scheme                                                                                     |
| 8  | Understanding the relevant uncertainties and risks                                                                                                                                  | 4  | Determining the appropriate study design for data collection                                                        |
| 9  | Defining the decision problem                                                                                                                                                       |    |                                                                                                                     |
| 10 | Data requirements                                                                                                                                                                   |    |                                                                                                                     |
| 11 | Obtaining informed consent                                                                                                                                                          |    |                                                                                                                     |
| 12 | Ethical issues                                                                                                                                                                      |    |                                                                                                                     |
| 13 | Identifying meaningful outcomes                                                                                                                                                     | 5  | Determining the relevant outcome measure(s) on which data are collected                                             |
| 14 | Quality of the data                                                                                                                                                                 | 6  | Dealing with data collection and monitoring                                                                         |
|    |                                                                                                                                                                                     | 7  | Dealing with data analysis                                                                                          |
|    |                                                                                                                                                                                     | 8  | Adapting the scheme to account for product modifications or a learning curve                                        |
| 15 | Ex-ante definition of a final decision rule                                                                                                                                         | 9  | Ex-ante definition of decision rule, based on possible outcomes of the scheme                                       |
| 16 | Deciding on when a CED is considered successful                                                                                                                                     | 10 | Reaching an agreement on price, reimbursement or use of the device at the end of the scheme                         |
| 17 | Withdrawing a technology                                                                                                                                                            | 11 | Withdrawing a device from the market when evidence indicates the device is not (cost-) effective                    |
| 18 | Defining an adequate duration for a scheme                                                                                                                                          | 12 | Obtaining agreements about the duration of the scheme and the stopping rule                                         |
| 19 | Market entry of new technologies                                                                                                                                                    | 13 | Dealing with the market entry of similar devices                                                                    |
| 20 | Economies of scale in the management of CED schemes and the difficulties small countries may have in applying CED schemes because of the associated costs and monitoring mechanisms |    | This challenge was considered transversal to all included challenges and covered in section A of the questionnaire. |

*In order to reduce the participants' burden when attending the interview, the original list of challenges reported in Reckers-Droog et al.<sup>1</sup> was reduced to 13 challenges by grouping some of the reported items into broader overarching challenges. For example, the challenges regarding the lengthy and complex negotiations to reach consensus on a scheme, the lack of transparency and lack of governance, as well as the challenges related to involving relevant stakeholders were grouped into the broader item "Obtaining stakeholder agreement on the scheme".*

*Nonetheless, the challenge regarding the quality of the data collected in a scheme was expanded to explicitly address three separate issues: dealing with data collection and monitoring, dealing with data analysis, and dealing with data issues when accounting for product modifications or the existence of a learning curve effect.*

*Challenge #20 in Reckers-Droog et al. was considered as a broader challenge which may constitute a barrier to the implementation of CED programmes for devices in the first place. As such, we did not discuss this as a separate challenge,*

<sup>1</sup> Reckers-Droog, Vivian, et al. "Challenges with coverage with evidence development schemes for medical devices: A systematic review." *Health Policy and Technology* 9.2 (2020): 146-156.

*but we covered it in section A of the questionnaire where we asked to decision makers the reasons for not using CED schemes for devices.*
