# Supplementary material for: Coverage with evidence development schemes for medical devices in Europe: characteristics and challenges
Source: PubMed Central journal article supplement (PMC8526454; doi:10.1007/s10198-021-01334-9), 2021-06-12
Supplement: 10198_2021_1334_MOESM3_ESM.pdf [file 10198_2021_1334_MOESM3_ESM.pdf]

### Electronic Supplementary Material 3. Overview of the countries, jurisdictions and institutions of the participants to the survey

| Country         | Jurisdiction          | Type of institution             | Institution of the participant                                        |
|-----------------|-----------------------|---------------------------------|-----------------------------------------------------------------------|
| Austria         |                       | National decision body          | Ludwig Boltzmann Institute for Health Technology Assessment (LBI-HTA) |
| Belgium         |                       | National/regional decision body | National Institute of Health and Disability Insurance (RIZIV)         |
| Bulgaria        |                       | University                      | Medical University Sofia                                              |
| Czech Republic  |                       | University                      | Czech Technical University in Prague                                  |
| Denmark         |                       | Hospital                        | Odense University Hospital                                            |
| England         |                       | National decision body          | National Institute of Health and Care Excellence (NICE)               |
| Finland         |                       | National decision body          | Finnish National Institute for Health and Welfare <sup>a</sup> .      |
| France          |                       | National decision body          | French National Authority for Health (HAS);                           |
|                 |                       | National decision body          | French Medicine Pricing Committee (CEPS)                              |
| Germany         |                       | National decision body          | The Federal Joint Committee (G-BA)                                    |
| Greece          |                       | Hospital                        | Onassis Cardiac Surgery Center (OSCS)                                 |
| Hungary         |                       | Health insurance                | National Health Insurance Fund of Hungary                             |
| Ireland         |                       | National decision body          | Health Information and Quality Authority (HIQA)                       |
| Italy           | National level        | National/regional decision body | Italian Medicine Agency (AIFA)                                        |
| Italy           | Emilia Romagna Region | Regional decision body          | Clinical Governance area - Emilia Romagna Region                      |
| The Netherlands |                       | National decision body          | National Health Care Institute (ZIN)                                  |
| Norway          |                       | Hospital                        | Norwegian Hospital Procurement Trust, Division Pharmaceuticals (LIS)  |

---

|             |               |                        |                                                                   |
|-------------|---------------|------------------------|-------------------------------------------------------------------|
| Poland      |               | National decision body | National Health Fund                                              |
| Portugal    |               | National decision body | National Authority of Medicines and Health Products<br>(Infarmed) |
| Scotland    |               | National decision body | Health Improvement Scotland                                       |
| Slovakia    |               | Health insurance       | Union Health Insurance                                            |
| Spain       | Basque Region | Regional decision body | Basque Office for Health Technology Assessment (Osteba)           |
| Sweden      |               | University             | Linköping University                                              |
| Switzerland |               | National decision body | Federal Office of Public Health (FOPH)                            |

---

<sup>a</sup>Until three months before the interview, actually Helsinki University Hospital (HUS)
